# Supplementary material for: A Randomized Controlled Trial Comparing the Effects of Sitagliptin and Glimepiride on Endothelial Function and Metabolic Parameters: Sapporo Athero-Incretin Study 1 (SAIS1)
Source: PLoS One. 2016 Oct 6;11(10):e0164255. doi: 10.1371/journal.pone.0164255 (PMC5053511; doi:10.1371/journal.pone.0164255)
Supplement: S1 Table — (XLSX) [file pone.0164255.s004.xlsx]

## Sheet: Sheet1
Medication (glimepiride; 0, sitagliptin; 1)	Age (years)	Gender (male; 1, female; 0)	Current smoker (yes; 1, no; 0)	Hyper tension (yes; 1, no; 0)	Dislipidemia (yes; 1, no; 0)	Angiotensin-converting enzyme inhibitors/ angiotensin II receptor blockers (yes; 1, no; 0)	Statin (yes; 1, no; 0)	Metformin (yes; 1, no; 0)	Diabetic nephropathy (yes; 1, no; 0)	%FMD (%)	SBP (mmHg)	DBP (mmHg)	cSBP (mmHg)	Augmentation index	Cardiac index (l/min/m2)	TPRI	LF/HF ratio of RRI	Height (cm)	Weight (kg)	BMI (kg/m2)	FPG (mmol/l)	HbA1c (%)	IRI (μU/ml)	pro-insulin (pmol/l)	proinsulin/IRI ratio	CPR	C-peptide index	Glucagon (pg/ml)	LDL (mg/dl)	HDL (mg/dl)	Triglyceride (mg/dl)	RLP (mg/dl)	Adiponectin (μg/ml)	SOD activity (U/ml)	total PAI-1 (ng/ml)	NT-proBNP (pg/ml)	TNF-α (pg/ml)	hsCRP (ng/ml)	u-Alb (mg/g.Cre)	d-ROMs	BAP
0	59	1	1	1	0	0	0	1	0	8.3	115	73	117	71	2.53333	2378	1.16667	172	75.4	25.4867	8.11111	7.9	7.21	15.8	30.5209	1.61	1.10274	104	133.2	44	214	9.4	1.39	2.5	37	15	1.2	832	9.2	296	2146.9
0	74	1	0	1	1	1	1	0	1	4.5	136	72	138	80	1.7	3476	0.833333	170	78	26.9896	8.55556	7.7	7.19	14.3	27.7002	2.1	1.36364	104	57.2	38	149	3.2	2.68	3.1	27	276	0.9	3340	98.8	302	2943.7
0	69	0	0	1	1	1	0	1	0	7.8	123	64	110	56	2.06667	2765	2.03333	152	62	26.8352	5.83333	7.1	5.92	9.9	23.291	1.52	1.44762	146	87	54	80	3	1.35	2.3	22	31	1.2	421	5.7	208	3277.2
0	64	1	1	1	1	1	0	0	0	4.3	123	76	127	79	1.6	3837.33	2.16667	184	80	23.6295	5.94444	6.8	2.56	8.7	47.332	1.37	1.28037	93	110.4	34	98	2.6	1.82	2.6	17	91	1.2	431	10.8	261	1939.8
0	62	0	0	1	1	0	0	0	0	7.6	149	89	162	99	1.86667	4064.67	0.433333	157	73	29.6158	6.22222	7.2	16.4	19.9	16.8999	2.35	2.09821	150	78.2	57	219	5.1	2.22	3.2	73	112	1.5	1780	13.7	301	2014.1
0	58	0	1	0	0	0	0	0	0	9.8	112	79	123	96	2.46667	2454	0.666667	151	46	20.1746	9.44444	8	7.37	26.2	49.5119	2.05	1.20588	51	107.2	55	99	3	4.45	2.3	79	20	1	1490	7.9	430	2199.1
0	65	1	0	1	0	1	0	1	0	4.5	141	75	146	83	1.76667	3845.67	1.23333	173	74	24.7252	9.22222	7.5	6.93	38.6	77.5764	2.27	1.36747	100	128.8	45	236	10.7	1.5	2.7	26	215	1.3	2820	11.6	399	1865.3
0	62	0	0	1	1	1	1	1	1	2.3	167	87	167	79	1.96667	ND	ND	156	81	33.284	9.72222	8	5.35	15.3	39.8303	1.6	0.914286	ND	82.4	56	158	4.6	6.96	3.9	27	276	1.5	2060	2560	310	2127.7
0	55	0	0	1	1	1	1	0	0	4.7	162	83	177	104	1.5	4373	1.2	155	70	29.1363	9.44444	7.1	7.21	20.5	39.5999	1.71	1.00588	104	84	51	175	4.9	7.67	3.2	23	42	1.2	303	31.7	332	2621.6
0	46	0	0	0	1	0	1	0	0	7	119	73	127	89	2.06667	2912	0.433333	156	75	30.8185	6.27778	8.6	9.43	33.1	48.8868	3.18	2.81416	69	124	57	85	4	0.54	2.9	22	23	0.8	5750	21.8	439	3581.7
0	49	0	1	1	1	1	1	0	1	5.6	144	83	160	105	1.86667	3512.33	1.36667	167	77	27.6095	7.05556	7.2	10.3	32.2	43.5406	2.41	1.89764	61	133.2	46	89	2.6	3.45	2.8	46	96	1.4	673	770	386	2549.2
0	60	0	0	1	1	0	0	0	0	5.5	143	87	157	98	1.56667	4301.67	0.4	150	55	24.4444	6.94444	8	5.62	13.7	33.9516	1.33	1.064	57	141.6	48	67	2.8	3.13	2.5	27	23	0.6	213	21.1	435	2809.4
0	36	1	0	0	1	0	0	0	1	6.6	133	86	134	70	1.6	4187	0.5	176	74	23.8895	10.9444	7.5	8.63	23	37.1187	1.82	0.923858	79	97.2	34	154	5.6	1.83	2	34	5	1.5	75	34.6	344	2334.8
0	73	1	0	1	1	1	1	0	0	8.5	150	70	158	91	2.26667	2630.67	1.73333	170	75	25.9516	6.94444	7.4	3.72	19.8	74.1306	1.54	1.232	67	129.2	56	164	4.6	3.1	3	24	109	1.1	7320	7.9	352	2235.6
0	62	0	0	1	1	1	1	1	1	6	93	60	102	89	2.23333	3417	2.4	147	48	22.213	7.27778	7.5	5.06	20.9	57.5269	1.38	1.05344	60	80.2	57	74	2.9	2.65	2.2	21	21	1.1	1910	18.4	441	2634.9
0	74	1	0	1	1	1	0	0	1	2.8	162	83	175	95	2.06667	ND	ND	168	71	25.1559	6.38889	7.2	5.02	18	49.9395	1.82	1.58261	94	164	49	105	4.8	4.26	12	21	84	2	531	382	376	3610.6
0	68	0	0	1	1	1	1	1	0	4.4	136	73	151	103	2.53333	2710.33	1.83333	157	62	25.1532	8.77778	7.4	5.09	13.6	37.2132	1.64	1.03797	54	94.4	58	98	3.6	6.57	2.4	34	73	1.3	336	4.7	362	2708.4
0	66	0	0	0	1	0	0	1	0	6.2	127	74	136	88	2.03333	3434	1.83333	159	56	22.151	6.55556	7	4.43	16.1	50.6172	1.88	1.59322	54	140.4	59	123	3.3	4.36	2.4	19	48	0.8	400	9.3	209	7128.6
0	68	0	1	1	0	0	0	0	1	7.7	147	67	157	93	2.8	2203.33	0.3	150	49	21.7778	6.5	7	2.47	14.3	80.6333	1.51	1.2906	57	120	75	110	4.6	5.91	2.6	27	197	0.8	1060	91.2	476	2725.1
0	65	0	0	1	1	0	1	0	1	7.6	150	87	163	94	3.06667	2093.33	3.36667	143	47	22.984	9.44444	8.1	7.78	19.5	34.9085	1.64	0.964706	60	125.4	61	68	2.7	4.24	3	31	35	0.6	347	27.5	537	3184.9
0	52	1	1	1	1	1	1	1	0	9	113	68	120	86	2.9	2110.33	1.66667	165	75	27.5482	6.83333	7.8	24.6	62.4	35.3285	4.29	3.4878	81	86	53	80	2.8	0.97	2.4	49	37	1.3	2570	5.9	274	4771.1
0	66	1	0	1	0	1	0	0	1	2	128	80	140	93	2.23333	3075.67	1.36667	166	62	22.4996	7.77778	7.3	3.33	9.1	38.0603	1.31	0.935714	64	139.4	93	73	3.7	4.82	2.8	10	44	0.5	93	37.4	351	3217.2
0	42	1	0	0	1	0	1	0	0	10	127	80	121	58	1.9	3560	5.36667	187	97	27.7389	8.88889	7.3	6.81	21.3	43.562	1.92	1.2	89	109	55	125	4.3	1.57	2.6	30	8	0.5	151	3.8	216	7500.3
0	60	0	0	0	1	0	1	0	1	8.3	143	84	147	80	2.76667	ND	ND	157	45	18.2563	9.55556	7.4	2.02	9.4	64.8115	0.96	0.55814	78	127.2	95	49	2.8	27	2.7	10	71	0.7	93	19.6	327	2787.6
0	67	0	1	0	1	0	1	1	0	4.6	116	71	121	84	1.96667	2867	0.366667	153	66	28.1943	10	8.3	6.12	40.4	91.9402	2.32	1.28889	66	124.6	51	112	4.3	4.29	2.6	35	54	1.2	527	25.1	410	2439.1
0	57	1	0	1	1	1	1	0	0	5.1	145	91	141	65	3.13333	2481.33	2.2	172	79	26.7036	8.55556	7.1	8.52	25.1	41.0308	2.45	1.59091	64	81.8	84	141	4.4	1.1	4.2	114	31	2.5	878	16.3	286	1958.7
0	42	0	1	1	1	0	1	0	0	8.6	115	80	123	84	2.26667	2621.67	0.433333	158	92	36.8531	10.7778	7.6	12.7	47.5	52.0913	2.39	1.23196	67	116.2	76	134	4.2	1.8	3.1	41	10	1.1	547	10	429	2292.9
0	58	0	0	1	0	1	0	0	0	5.6	118	70	130	94	3.1	2320	0.1	153	56	23.9224	7.27778	7.1	3.71	16.2	60.8158	1.32	1.00763	42	118.2	86	59	3.6	4.02	2.9	21	32	0.8	276	8.8	386	2693.4
0	56	0	0	0	1	0	1	1	0	4.8	124	80	131	83	2.63333	2594.67	0.433333	155	64	26.6389	7.33333	7.3	4.18	9.4	31.3204	1.16	0.878788	95	113.8	67	71	2.8	3.74	2.8	30	46	0.8	445	5.5	358	3076.7
0	59	0	0	0	0	0	0	0	0	3.5	131	78	137	83	1.83333	3284	1.33333	158	50	20.0288	6.5	6.9	3.41	12.2	49.8289	1.22	1.04274	56	120.8	54	56	3.6	6.99	38.8	14	47	0.8	138	10.1	336	2905.5
0	76	1	0	0	0	0	0	1	1	0.8	143	63	143	81	2.4	2860.67	1.33333	165	66	24.2424	9.27778	7.7	3.3	28.7	121.128	1.43	0.856287	58	100.6	56	107	3.5	0.93	1.9	23	53	0.7	28200	43.3	380	2824.6
0	60	0	0	1	1	0	0	1	0	6.7	126	70	129	78	2	3012.67	1.9	161	63	24.3046	7.61111	7.3	2.08	13.1	87.7169	1.23	0.89781	65	173.6	57	97	4.8	3.5	2.5	10	52	1	434	5.2	226	2851.1
0	55	0	1	1	1	1	1	1	0	5	121	69	124	78	2.4	2248.67	0.6	159	69	27.2932	7.22222	7.4	10.6	23.6	31.0086	2.22	1.70769	86	88	57	105	4.5	1.65	3.5	16	23	1.1	546	7.6	348	3102.1
0	66	1	1	0	0	0	0	0	0	4.1	142	83	137	67	2.96667	2305.67	2.03333	171	69	23.597	9.94444	8.3	2.17	18.2	116.812	1.38	0.77095	63	84.8	60	116	4.7	2.92	2.7	97	5	0.9	248	34.6	354	2934.2
0	61	0	0	1	1	1	1	1	1	5.4	136	73	134	73	2.26667	2934.33	1.46667	156	58	23.833	8.16667	6.8	9.5	13.7	20.085	2.03	1.38095	51	75.6	52	102	3.1	0.89	3.2	14	33	1.1	81	72.6	325	2895.9
0	63	1	1	1	0	1	0	1	1	6.3	98	65	102	71	3.2	1739	0.566667	170	62	21.4533	8.94444	8.2	2.81	13.1	64.9293	1.53	0.950311	81	92.4	49	88	4.1	2.5	2.6	14	19	1.1	629	20	403	3162.5
0	48	1	0	1	1	1	1	1	0	5	122	78	118	59	2	ND	ND	168	86	30.4705	8.55556	7.3	7.16	40	77.8077	2.52	1.63636	93	87.8	48	186	4.3	0.93	1.8	20	16	1	603	4.4	303	2261.6
0	58	1	1	0	1	0	1	0	0	4.6	109	64	115	83	2.33333	2476.67	1.26667	175	68	22.2041	9	7.3	9.01	20.2	31.225	2.99	1.84568	54	104.4	52	78	2.6	2.46	1.7	25	34	1.2	5270	3.5	440	2932.4
0	59	1	1	1	1	1	1	1	0	2.9	136	88	138	73	1.23333	5640.67	0.4	173	92	30.7394	9.83333	7.6	4.91	64.2	182.108	3.08	1.74011	106	89.4	34	323	10.4	0.84	1.8	43	142	2.4	12600	14.9	432	1878.6
0	37	1	0	1	1	1	1	1	0	7.1	109	71	107	60	1.73333	3663.33	0.833333	191	96	26.3151	7.61111	8.2	10.2	48.2	65.8146	2.3	1.67883	87	80.6	43	82	2.6	1.3	3.1	32	13	0.9	140	15.9	164	2965.4
0	71	1	0	0	1	0	1	0	0	4.7	133	73	139	86	2.63333	2358.67	1.2	165	59	21.6713	6.38889	7.1	7.22	23.6	45.525	1.86	1.61739	122	73.8	51	156	3.9	0.22	2.4	21	20	1	7320	24	357	3826.4
0	61	1	1	1	1	0	0	0	1	2.9	146	75	148	81	1.73333	3155.67	0.666667	158	70	28.0404	8.33333	6.9	8.71	20	31.9807	2.24	1.49333	106	137.8	52	111	4.6	1.86	2.7	42	9	1	1720	119	388	3465.9
0	49	1	0	1	0	1	0	1	1	5.3	148	100	148	66	2.7	2927.67	4.8	168	63	22.3214	8.16667	7.6	8.64	34.6	55.7748	2.38	1.61905	60	139	61	95	4.1	1.89	9.7	20	10	1	242	30.8	279	2419.4
0	64	1	0	0	0	0	0	0	0	4.8	165	96	177	92	3.33333	2331.67	0.3	162	58	22.1003	6.72222	7	1.52	3.1	28.4049	0.56	0.46281	44	89.8	59	36	2	3.9	2.7	12	29	1	212	4.6	328	2199.6
0	65	1	0	1	1	1	0	1	1	9.1	178	104	166	83	2.23333	3969	6.8	168	74	26.2188	10.6667	7.4	6.66	26.7	55.8358	2.43	1.26562	100	47	37	280	6.3	1.67	2.1	24	401	2.1	784	10500	294	1866
0	54	0	0	0	1	0	1	0	0	6.4	130	84	143	115	2.5	2670.67	0.533333	156	49	20.1348	7.66667	7	2.95	10.3	48.6285	1.06	0.768116	38	86	74	90	2	5.39	3.4	29	46	1.1	113	10.8	328	2314.9
0	60	1	0	1	1	1	1	1	0	1.6	132	82	140	86	2.33333	3151	0.566667	181	81	24.7245	9.66667	7.6	5	9.1	25.3482	1.44	0.827586	69	61	63	135	3.3	2.1	2.2	14	33	1.1	224	5.1	309	1977.8
0	60	0	1	0	1	0	1	1	1	2.7	141	82	156	103	2.73333	2275	2.1	154	63	26.5643	8.72222	8	11.3	30.1	37.0991	2.74	1.74522	68	111.8	58	111	3.2	1.91	2.7	44	19	1.2	1200	37.2	392	3490.4
0	39	1	0	0	1	0	1	1	0	7.5	125	83	130	77	2.3	3648.67	1.1	178	70	22.0932	7.94444	7	4.67	27.9	83.2076	1.28	0.895105	57	107	51	85	2	1.58	2.1	20	10	0.6	88	8.4	305	3102.8
0	74	0	0	0	1	0	1	1	0	4.9	136	68	147	94	2.13333	2940	1.33333	144	51	24.5949	6.16667	7.7	2.86	3.1	15.0963	0.97	0.873874	60	83	86	70	3.4	2.64	3.3	15	51	1.5	345	12.4	363	3194.7
0	53	1	1	0	1	0	0	1	0	8.2	116	76	123	83	3.86667	1704.67	9.56667	172	82	27.7177	7.11111	7.5	7.84	33.4	59.3343	2.73	2.13281	79	123.8	72	116	4	1.41	2	21	15	0.9	1650	10.2	350	2130.1
0	66	1	0	0	0	0	0	1	0	4.6	137	76	150	94	1.2	8762.67	0.666667	169	83	29.0606	6.88889	7.2	4.24	11.4	37.4468	1.78	1.43548	51	117.2	37	79	2.3	2.85	7.3	11	82	1.2	656	7.2	328	2720.6
0	60	0	0	1	1	1	1	1	0	7.1	107	69	120	101	1.63333	3537.33	1.93333	155	50	20.8117	10	8.6	6.63	26.9	56.5086	1.83	1.01667	45	88.6	54	162	3.9	2.55	2.8	46	16	1.3	216	7.8	286	4482.4
0	72	1	0	0	0	0	0	0	0	3.1	130	64	131	79	2.36667	2817.33	0.566667	156	56	23.0112	8.27778	7.3	1.46	3.5	33.388	0.95	0.637584	42	125.8	87	36	3.4	1.77	10.4	10	57	1.1	190	13.7	359	1939
0	59	1	0	1	1	1	1	1	1	2.5	157	87	164	86	2.3	3217	1.6	165	63	23.1405	8.22222	8.2	3.03	25.2	115.833	1.39	0.939189	59	67	46	80	2.6	2.5	10.4	10	63	1	355	298	302	2772.7
1	72	0	0	0	0	0	0	0	0	5.2	165	72	183	135	1.7	4012.67	ND	149	44	19.8189	6.94444	7.9	2.45	3.2	18.1911	0.9	0.72	65	103.4	86	53	2.9	7.15	3.6	11	151	1.3	61	14	131	3039.8
1	55	0	0	0	1	0	0	0	0	7.1	115	73	114	64	1.8	3749	ND	146	66	30.7937	11.3889	7.9	14.2	27.6	27.0705	2.98	1.45366	63	81.2	49	234	8.1	1.28	4.4	95	8	1.1	998	116	375	2424.3
1	66	1	0	1	0	0	0	0	0	6.2	116	70	112	61	3.03333	2353.33	ND	163	67	25.1797	8.83333	6.8	5.37	17.9	46.4253	1.88	1.18239	59	117.8	70	51	4.8	3.41	2.4	45	10	0.8	198	4.8	188	7354.5
1	70	1	0	0	0	0	0	0	0	4.2	117	65	124	87	1.93333	3931.67	0.6	161	61	23.533	7.55556	7.3	5.92	24.1	56.6984	1.75	1.28676	78	118.4	45	178	7.1	1.41	2.2	17	13	1	316	9.9	243	1528
1	44	1	0	1	1	1	0	1	0	4.2	124	81	119	57	1.63333	4177	1.96667	163	87	32.7449	7.66667	7.4	5.22	13.6	36.2864	1.54	1.11594	109	121.6	36	162	6.2	2.25	2	46	6	2.1	1840	12.4	314	1749
1	35	1	1	0	1	0	1	1	0	8.2	112	64	113	75	2.86667	1806.33	2.16667	170	83	28.7197	7.16667	7	5.97	24.4	56.9234	1.91	1.48062	97	93.4	30	118	3.5	9.87	8.7	27	24	0.8	653	5.5	635	1916.8
1	59	1	0	0	1	0	0	1	0	10.1	124	86	132	80	2.33333	2993.33	ND	168	74	26.2188	9.44444	7.8	4.24	13.4	44.0164	1.45	0.852941	99	126.6	60	87	3.2	2.43	2.1	26	39	0.6	145	4.9	223	2097.4
1	72	1	0	1	0	0	0	0	0	2.7	137	77	150	96	2.2	2770	1.16667	162	65	24.7676	7.94444	7.5	15.7	30.9	27.4116	3.34	2.33566	80	30.8	38	61	2	1.17	3.7	32	82	2.1	746	8.8	210	2217.9
1	66	0	0	0	0	0	0	0	0	3.6	145	84	150	82	2.5	2580	3.83333	144	54	26.0417	8.22222	7.1	3.88	12.6	45.2287	0.96	0.648649	87	116.6	72	52	3.4	7.58	3	29	42	0.7	353	6.7	356	2611.7
1	59	1	1	0	1	0	0	0	0	4.1	101	63	103	72	2.4	2719.67	0.366667	164	60	22.3081	7.94444	8.1	3.55	13.2	51.787	1.35	0.944056	34	140.6	65	57	2.1	3.18	3	15	24	1.3	65	2.5	238	2461.9
1	56	1	1	0	1	0	1	1	0	6.5	133	91	146	92	2.56667	2892	5.4	165	63	23.1405	10.2222	7.8	6.13	28.3	64.2986	2.06	1.11957	71	98.4	48	73	2.4	2.66	3.1	37	7	0.9	287	11.6	219	2459.6
1	58	0	1	1	1	1	1	1	0	2.6	119	71	129	93	1.7	2965.33	0.733333	158	70	28.0404	9.05556	7.6	7.88	18.6	32.8747	2.06	1.2638	ND	133.6	63	82	3.2	3.64	2.9	29	49	1.1	730	7.3	357	2810.2
1	63	1	1	0	1	0	1	0	0	4.5	110	55	113	80	2.63333	2340	1.76667	169	64	22.4082	10.5	8	5.44	48	122.89	1.91	1.01058	ND	86.4	50	308	11.6	0.55	7.7	50	34	1.6	251	16.6	293	2173.5
1	35	0	0	1	1	0	0	1	1	11.9	140	85	137	67	2.33333	3351.33	1.1	156	74	30.4076	9	7.8	9.38	80.8	119.973	3.45	2.12963	165	138.8	54	281	10.9	1.96	5.2	70	29	1.7	1620	163	404	1765
1	55	1	0	1	0	1	0	0	1	5.9	155	95	159	81	1.7	4237.67	0.8	171	62	21.2031	10.6667	7.3	9.54	30.8	44.9653	2.67	1.39062	111	84.8	55	71	2.8	3.81	3.8	15	136	1.4	78	277	285	2553
1	63	1	0	0	0	0	0	1	0	3.8	151	84	154	80	2.3	3229.33	1.43333	163	68	25.5937	7.88889	8.4	4.08	8.9	30.3812	1.01	0.711268	78	69.4	56	113	4.9	2.26	2.4	94	13	2.1	3790	21.8	383	2149.2
1	60	0	0	0	1	0	1	1	0	6.3	123	81	135	95	2.06667	3413	1.03333	162	64	24.3865	8.83333	7.4	10.3	27.2	36.7796	2.77	1.74214	120	86.6	48	227	7.2	1.38	9.4	39	11	0.9	503	9.6	368	2771.5
1	69	0	0	1	1	1	1	1	0	4.8	135	72	150	100	1.63333	3692	0.566667	156	73	29.9967	8.27778	7.2	7.12	22.3	43.6215	1.65	1.10738	105	97.4	57	103	3.3	4.38	2.5	28	82	0.9	248	120	288	2047.3
1	38	1	0	1	1	1	1	1	0	5.6	141	87	134	59	1.3	5612	2.26667	183	118	35.2355	10.7222	7.6	16.3	99.1	84.6762	3.68	1.90674	49	88	41	55	2.3	2.9	2.5	60	15	0.8	1370	10.4	212	7285
1	80	1	0	1	1	1	1	0	1	6.8	145	63	146	82	2.73333	2299	1.46667	159	67	26.5021	8.94444	7.3	13.2	27.7	29.2268	3.05	1.89441	60	116	42	245	8.2	3.95	2.6	20	973	1.2	2820	24.5	460	1988.6
1	40	1	0	1	1	1	1	1	0	5.8	123	76	112	46	2	3406	2.06667	167	85	30.478	11.3889	7.3	18.1	87.4	67.2525	3.36	1.63902	120	112	54	235	8.8	1.35	1.8	38	6	1.2	300	9.8	399	2703
1	64	1	0	1	0	1	0	1	0	3.1	151	81	157	86	2.66667	2614	2.43333	159	72	28.4799	6.88889	8.1	4.97	16.3	45.678	1.36	1.09677	113	134	47	70	2.6	2.18	2.5	11	18	1.1	201	18.8	347	2276.8
1	62	1	1	1	1	1	1	0	0	11.8	139	86	151	92	2.3	2758	1.66667	165	57	20.9366	6.5	6.9	1.89	10.9	80.3231	1.02	0.871795	66	95.6	48	117	2.6	1.73	2.4	11	106	1.4	105	6.4	281	2963.3
1	56	1	0	1	1	0	0	0	0	5.7	116	84	121	71	1.73333	4421	3.63333	167	80	28.6851	7.05556	7.1	5.75	36.7	88.8943	1.78	1.40157	77	135.2	36	114	4	1.05	2.3	21	21	0.8	253	16.8	434	2850.1
1	70	1	0	1	1	0	0	0	1	1.7	119	71	120	72	2.73333	2424.33	4.8	165	59	21.6713	7.66667	7.1	6.61	45.4	95.6599	1.78	1.28986	111	130.4	47	68	2.1	2.02	2.1	36	88	2.4	64600	27	379	2942.5
1	59	1	1	0	0	0	0	1	1	3.1	145	93	159	99	2.73333	2754	4.6	162	78	29.7211	8.55556	8.1	4	25	87.0474	1.89	1.22727	73	92.2	42	99	3.7	2.54	2	28	12	1.6	698	28	298	2829.8
1	74	0	0	1	1	1	1	0	0	1.8	116	60	122	85	1.66667	2855	0.3	146	67	31.4318	6.83333	7.7	12.3	38.7	43.8209	2.24	1.82114	88	109.8	54	156	5.9	2.09	3.7	30	62	0.8	2150	13.6	381	2842.9
1	47	1	1	1	1	1	0	1	0	3.3	136	87	150	97	2.46667	2634.67	0.8	168	71	25.1559	10.4444	7.3	4.01	34.1	118.436	1.98	1.05319	53	60.8	55	301	8.3	2.49	2.4	37	46	2.3	714	4.3	209	1054.7
1	59	1	1	1	0	1	0	1	0	6.2	113	78	116	70	1.93333	3720.67	0.8	170	71	24.5675	9.5	7.9	11.5	39.1	47.3538	2.61	1.52632	93	109.6	61	147	5.8	1.27	2.9	39	27	2	4230	7.1	424	2391.8
1	68	1	1	1	1	1	0	1	1	7.7	125	69	129	80	3.3	1782.33	0.766667	165	57	20.9366	8.88889	7.1	8.06	23.4	40.4349	3.19	1.99375	130	89.2	39	519	40.2	1.89	3.1	39	41	1.5	643	171	332	2473.8
1	56	1	0	0	0	0	0	1	0	6.8	118	82	118	62	2.9	2231.67	1.76667	165	62	22.7732	8	7.1	10.8	29.5	38.0429	2.08	1.44444	79	108	45	500	34.5	1.11	2	16	27	1.3	658	11.4	321	531.9
1	47	1	0	1	0	1	0	1	0	1.9	139	99	146	78	2.73333	2662	2.36667	177	92	29.3658	7.77778	7.6	13.2	39.5	41.6772	2.5	1.78571	89	108.4	44	153	5.1	1.24	2.3	23	26	1.2	1470	4.7	239	2393.7
1	71	0	0	0	1	0	1	1	0	5	127	68	135	88	1.7	3783	0.533333	152	59	25.5367	7.44444	6.8	8.94	20	31.1579	2.47	1.84328	84	81	51	185	5.2	2.22	2.9	23	18	7	339	27.9	324	2676.8
1	63	1	0	1	1	1	1	1	0	11.3	126	74	134	87	2	3663.67	0.833333	162	64	24.3865	7.61111	6.7	2.99	11.4	53.1018	1.39	1.0146	58	80.2	90	74	2.8	5.46	10.9	22	63	0.9	191	28.9	379	2559.4
1	74	0	0	0	1	0	1	0	0	11.7	138	63	146	89	2.03333	2856.67	3.2	150	42	18.6667	6.5	7.4	4.15	9.8	32.8892	1.13	0.965812	45	93	53	70	2	8.33	2.6	14	56	1.3	181	7.8	392	3730.3
1	61	1	1	0	1	0	0	1	0	4.2	107	60	113	83	1.63333	3582	0.266667	165	61	22.4059	8.16667	8.2	3.89	20.8	74.4714	1.33	0.904762	67	100.2	55	54	2.8	0.34	10.4	17	18	0.8	179	4.2	354	3070.2
1	58	1	1	1	1	1	1	1	0	2.1	130	78	136	82	1.93333	3853.67	1.6	175	81	26.449	5.66667	7.8	6.62	25.6	53.8589	1.61	1.57843	104	63.2	50	69	2.6	1.02	2.7	10	48	1	347	6.1	279	3023.5
1	56	0	0	1	1	1	1	0	0	8.1	134	87	146	96	2.26667	3527.33	0.4	165	79	29.0174	6.33333	7.3	5.12	27.8	75.6224	2.32	2.03509	49	103.6	42	162	5.3	2.53	3.3	34	67	1.4	888	7.6	377	2645.4
1	62	1	1	0	0	0	0	0	1	2.3	135	83	138	77	2.56667	3009.67	5.33333	173	56	18.7109	7.83333	7.4	2.12	7	45.9873	0.85	0.602837	65	49.8	58	246	10.2	0.95	2.5	34	47	0.8	2880	63	472	2801.8
1	66	0	0	0	0	0	0	1	1	4	142	82	150	87	2.33333	2424	1.33333	155	57	23.7253	10.0556	7.5	4.32	15.4	49.6492	1.31	0.723757	49	112.6	55	132	3.8	5.67	2.7	15	101	1.1	915	240	522	3099.3
1	54	1	1	0	1	0	1	1	0	9.7	103	67	109	80	2.03333	3143.33	0.6	175	64	20.898	6.22222	6.8	2.79	3.1	15.4751	1.37	1.22321	68	58.6	59	52	2	2.65	1.8	13	16	1	382	4	327	2679.5
1	50	1	0	1	1	1	1	1	1	8.3	153	90	168	97	1.9	3911.67	0.466667	165	79	29.0174	7.83333	7.3	9.78	18.4	26.2032	2.4	1.70213	57	91.6	65	42	2.1	1.11	2.2	18	10	0.8	106	40.4	341	2670.5
1	63	1	0	1	1	1	1	0	0	4.4	125	78	132	82	1.93333	3553.67	1.4	157	73	29.6158	8.5	8	1.48	43.8	412.181	2.62	1.71242	66	96	44	170	4.4	1.95	2.2	61	28	15.8	6730	4.2	422	2135.8
1	76	1	0	1	0	1	0	1	1	4.2	152	82	162	90	1.53333	4370.33	1.8	159	69	27.2932	6.83333	7.3	8.36	20.1	33.4862	2.76	2.2439	61	94.6	41	62	2.4	1.47	3.1	21	113	1.8	191	37.1	292	3163.6
1	71	0	0	0	1	0	0	1	0	8	134	76	148	99	3	2006	0.266667	140	45	22.9	6.16667	7.8	3.66	12.1	46.0447	0.94	0.846847	60	122.2	64	234	8.4	8.38	3.1	30	103	1.1	3230	6.3	370	1511.9
1	64	0	0	0	1	0	0	0	0	7.4	118	76	129	91	1.9	3187.67	0.166667	156	57	23.4221	7.88889	7.3	2.22	7.2	45.1705	0.82	0.577465	62	130	68	60	2.6	7.07	2.7	10	59	1	146	4.9	314	2043.4
1	51	0	0	0	1	0	1	1	0	4.6	139	86	148	86	2.6	2781	1.06667	160	75	29.2969	8.16667	7.1	16.6	33.3	27.9391	2.48	1.68707	85	107.4	72	83	3.7	1.54	2.5	39	6	1.1	828	5.5	355	2794.6
1	64	1	1	1	1	0	0	1	0	1.7	129	79	135	83	2.33333	2933.33	0.633333	174	69	22.7903	7.72222	7	3.67	9	34.1548	1.63	1.17266	71	148.6	41	207	5.1	2.37	2.1	16	125	1.4	3240	16.4	335	2110
