# Supplementary material for: A Randomized Controlled Trial Comparing the Effects of Sitagliptin and Glimepiride on Endothelial Function and Metabolic Parameters: Sapporo Athero-Incretin Study 1 (SAIS1)
Source: PLoS One. 2016 Oct 6;11(10):e0164255. doi: 10.1371/journal.pone.0164255 (PMC5053511; doi:10.1371/journal.pone.0164255)
Supplement: S2 Table — (XLSX) [file pone.0164255.s005.xlsx]

## Sheet: Sheet1
Medication (glimepiride; 0, sitagliptin; 1)	Age (years)	Gender (male; 1, female; 0)	%FMD (%)	SBP (mmHg)	DBP (mmHg)	cSBP (mmHg)	Augmentation index	Cardiac index (l/min/m2)	TPRI	LF/HF ratio of RRI	Height (cm)	Weight (kg)	BMI (kg/m2)	FPG (mmol/l)	HbA1c (%)	IRI (μU/ml)	pro-insulin (pmol/l)	proinsulin/IRI ratio	CPR	C-peptide index	Glucagon (pg/ml)	LDL (mg/dl)	HDL (mg/dl)	Triglyceride (mg/dl)	RLP (mg/dl)	Adiponectin (μg/ml)	SOD activity (U/ml)	total PAI-1 (ng/ml)	NT-proBNP (pg/ml)	TNF-α (pg/ml)	hsCRP (ng/ml)	u-Alb (mg/g.Cre)	d-ROMs	BAP
0	59	1	9.3	120	76	124	77	2.46667	2404.67	2.13333	172	77	26.0276	8.61111	7.2	8.36	24.2	40.3167	2.04	1.31613	87	136.4	44	93	3.7	1.4	2.2	72	7	0.9	872	20.1	190	2998.2
0	74	1	3.7	172	81	190	105	1.93333	4111.33	1.83333	170	79	27.3356	9.27778	7.2	6.61	20.5	43.1945	2.11	1.26347	68	78.6	51	112	3	3.66	3.4	72	178	1	1180	337	350	2326
0	69	0	8	131	59	132	81	2.5	2125.67	4.5	152	62	26.8352	5.33333	6.2	10	14.9	20.7521	2.45	2.55208	100	119	53	90	3.7	1.58	2.7	40	85	1.3	217	5.3	195	7054.4
0	64	1	2.4	150	76	154	84	2.03333	3820.33	1.1	184	80	23.6295	5.61111	6.3	3.53	17.7	69.8352	1.47	1.45545	67	148.2	46	94	4.1	3.45	3.1	24	66	1	939	11.9	384	3165.8
0	62	0	6.8	155	91	166	92	1.83333	3977.67	0.366667	157	73	29.6158	5.44444	6.4	17.9	18.6	14.4722	2.42	2.46939	86	101.2	59	229	6.9	2.32	3.2	53	71	1.1	1620	25.9	218	6632
0	58	0	8.8	122	80	131	90	3.2	2054	1.3	151	47	20.6131	7.27778	7.3	3.95	22	77.5713	1.44	1.09924	39	124.4	68	93	4.7	4.62	2.8	30	11	0.8	941	4.5	445	3474.5
0	65	1	3.4	174	84	187	94	2.2	3597.33	0.633333	173	76	25.3934	7.94444	6.5	7.06	27.7	54.645	2	1.3986	78	79.8	43	641	39.2	1.75	2.4	40	123	0.9	3170	13	436	1570.9
0	62	0	ND	ND	ND	ND	ND	ND	ND	ND	156	ND	ND	ND	ND	ND	ND	ND	ND	ND	ND	ND	ND	ND	ND	ND	ND	ND	ND	ND	ND	ND	ND	ND
0	55	0	5	154	82	167	95	1.73333	3666.67	1.46667	155	70	29.1363	7.83333	6.7	4.42	17.7	55.7733	1.38	0.978723	80	84	49	155	4.2	7.27	4	22	70	1.3	360	25	318	2998.9
0	46	0	11.9	108	68	116	85	2.16667	2847.67	0.8	156	74	30.4076	6	7.1	16.8	36.7	30.4251	3.96	3.66667	71	114.2	54	124	3.9	0.94	2.1	16	25	1.4	2360	12.9	455	2468.1
0	49	0	5.3	121	79	131	90	1.86667	3400.33	1.5	167	77	27.6095	5.66667	6.1	4.99	22.8	63.637	1.67	1.63725	41	108.2	42	99	3.4	4.14	2.2	19	59	0.9	537	415	421	2819.1
0	60	0	5.6	152	75	163	93	2.2	3231.67	1.13333	150	54	24	6.5	5.6	5.37	16.8	43.5723	1.58	1.35043	50	163.8	49	76	3.2	3.55	2.2	23	27	0.8	158	36	357	3073.5
0	36	1	6.5	127	87	125	60	1.5	4573.67	1.76667	176	74	23.8895	9.05556	6.9	11.7	22.7	27.0219	2.39	1.46626	66	129	32	170	6.7	1.76	2	22	5	1.8	291	28.1	482	2608.9
0	73	1	6.3	149	79	153	83	2.33333	2796.33	1.23333	170	76	26.2976	6.66667	6.5	7.61	18.9	34.5902	1.92	1.6	81	114.4	52	158	4.9	2.98	3.3	21	193	1.2	4740	28	357	2590.6
0	62	0	6.8	128	76	131	77	3.1	1947.67	2.1	147	48	22.213	5.88889	6.7	2.96	18.1	85.1652	1.17	1.10377	32	98.4	38	83	2.2	3.01	2	11	54	0.9	16500	10.8	544	2913.8
0	74	1	3.8	167	83	84	96	ND	ND	ND	168	72	25.5102	5.33333	6.4	3.08	9.2	41.6019	1.21	1.26042	61	159	56	75	4.3	4.47	13.5	24	114	3.2	1530	464	364	2609.4
0	68	0	3.6	144	83	158	98	1.96667	3411.33	0.933333	157	63	25.5588	7.77778	7	4.76	13.4	39.2079	1.64	1.17143	51	88.4	52	108	3.1	5.89	2.6	19	110	1.6	514	4.9	508	3411.5
0	66	0	5.7	126	74	136	90	1.96667	3287.67	2.53333	159	57	22.5466	6.05556	6.4	4.17	15.7	52.4372	2.03	1.86239	67	94.6	45	77	2.2	3.35	2.9	20	37	1.5	415	2.9	322	2862.9
0	68	0	6.3	115	64	121	87	2.86667	2182	0.233333	150	49	21.7778	6.05556	6.4	3.41	16.6	67.7999	1.68	1.54128	62	90.8	58	86	3.1	5.53	2.1	10	118	1.1	493	52.8	359	2747.9
0	65	0	6.2	148	74	159	93	2.5	2721.33	0.966667	143	48	23.473	7.33333	6.8	4.82	16.7	48.2553	1.39	1.05303	56	107.4	60	43	2.2	3.39	3.1	18	76	1.2	136	19.4	411	3454
0	52	1	5.7	122	78	132	89	2.56667	2878.33	0.866667	165	75	27.5482	6.5	7.3	19.3	78.4	56.5763	4.34	3.7094	77	82.4	45	88	2.9	0.95	2.1	39	16	2	1370	7.8	347	2823.7
0	66	1	3.6	135	82	150	100	2.46667	2587	1.2	166	64	23.2254	7.38889	6.3	4.32	8.5	27.4038	1.29	0.969925	53	159.8	82	81	3.8	3.27	2.2	12	22	0.9	194	37.3	504	3493.3
0	42	1	7.6	120	80	116	55	1.83333	3922	4.73333	187	97	27.7389	7.61111	6.5	9.43	24.9	36.7759	2.36	1.72263	74	97.8	49	111	4.1	1.51	2.5	25	7	0.8	200	2.5	337	2291.5
0	60	0	ND	ND	ND	ND	ND	ND	ND	ND	157	ND	ND	ND	ND	ND	ND	ND	ND	ND	ND	ND	ND	ND	ND	ND	ND	ND	ND	ND	ND	ND	ND	ND
0	67	0	6	116	62	120	82	2.23333	2589.67	0.3	153	68	29.0487	7.16667	8	4.45	31.9	99.8404	2	1.55039	33	127.4	49	83	3.1	3.3	4.9	27	96	1.4	1450	18.2	508	2663.5
0	57	1	2.8	134	85	135	72	2.63333	2701.33	1.5	172	79	26.7036	8.11111	6.2	13.8	29.6	29.8736	4.63	3.17123	85	101	81	185	5.7	1.02	3.6	99	12	1.9	608	7.8	297	2853.6
0	42	0	8.1	122	82	132	87	2.76667	2338.67	1.8	158	92	36.8531	8.55556	7.4	8.76	31.8	50.559	2.01	1.30519	55	97.2	71	179	4	2.07	3.3	30	35	1.1	564	10.3	423	2634.6
0	58	0	9.2	114	68	126	96	2.5	2464.33	0.4	153	57	24.3496	7.22222	6.4	4.43	13.3	41.8142	1.56	1.2	58	110	78	55	3.2	4.15	2.9	28	53	0.9	11800	8.9	454	2643.1
0	56	0	4.8	134	70	140	85	2.6	2503.67	1.33333	155	67	27.8876	7.33333	7.1	4.91	8.8	24.9618	1.09	0.825758	93	145	77	75	3.1	4.01	2.8	36	58	0.8	656	6	380	2725.5
0	59	0	5.9	135	78	148	95	2.06667	3319.67	0.8	158	50	20.0288	6.27778	6.5	3.58	10	38.9038	1.49	1.31858	61	105.6	63	37	3.5	7.11	27.2	18	66	0.6	1340	10.1	453	2934.3
0	76	1	2.7	173	76	182	91	2.13333	3446.33	10.1	165	67	24.6097	7.27778	6.6	5.58	30.7	76.6266	1.98	1.51145	68	100	55	210	4.4	1.65	2.7	23	36	0.8	1300	53.5	300	2285.7
0	60	0	4.4	124	67	129	82	2.23333	2500.67	2.2	161	64	24.6904	6.72222	6.2	4.36	10.3	32.9023	1.51	1.24793	69	181	54	95	4.6	3.14	2.6	15	50	1.2	450	4.2	301	3033.7
0	55	0	3.4	130	76	134	80	2.86667	2200.33	2.4	159	70	27.6888	6.83333	7.2	9.64	17.9	25.8614	2.14	1.73984	120	72.2	59	149	4.8	1.67	3.2	32	9	1	260	14.6	351	3421.9
0	66	1	4.1	128	77	121	60	2.9	2311	2.1	171	71	24.281	8.66667	7.5	5.81	19.5	46.7449	1.86	1.19231	62	90.4	54	93	2.8	2.57	2.3	53	14	1.2	2120	15.2	337	1611.5
0	61	0	4.8	144	74	143	77	2.2	2931	3.3	156	59	24.2439	7.11111	6.5	3.99	8.7	30.3684	1.46	1.14062	62	99.2	51	119	3.5	1.1	3.5	13	27	0.8	94	8.6	401	3195.5
0	63	1	10.1	121	76	125	77	4	1524.67	5.76667	170	60	20.7612	6.38889	6.3	2.24	8.1	50.3631	0.96	0.834783	123	93.4	67	58	2.5	2.67	2.7	19	14	0.9	604	38.4	367	2897.5
0	48	1	5.9	122	79	127	78	1.8	4220.67	4.53333	168	90	31.8878	8.05556	7.5	6.06	48	110.317	2.28	1.57241	109	108.4	43	123	3.2	0.82	2.2	28	8	1.3	507	4.8	275	2789
0	58	1	7.6	118	65	126	88	3.6	3797.33	0.733333	175	69	22.5306	6.83333	6.8	5.05	13.6	37.5079	1.99	1.61789	74	110.6	45	92	3.7	2.14	2	21	65	1.2	4970	3.9	374	2852.7
0	59	1	5.1	155	89	155	76	1.63333	4556.33	0.733333	173	93	31.0735	7.44444	7.6	6.47	72.7	156.497	2.95	2.20149	149	85.4	34	278	9	0.99	2.9	30	210	2.1	2050	13.9	369	2137.7
0	37	1	11.9	104	71	104	60	2.06667	3138	2.86667	191	97	26.5892	7.55556	7.8	7.87	44.2	78.221	2.06	1.51471	80	114	46	95	2.9	0.96	3.1	44	5	0.8	139	21	163	2829.6
0	71	1	7.2	116	69	119	76	2.43333	2425.67	1.73333	165	60	22.0386	5.83333	6.5	4.45	21.4	66.9776	1.92	1.82857	91	93.4	54	128	3.1	0.22	2.4	22	5	1	487	9.2	318	3046.6
0	61	1	5.1	125	77	129	76	1.6	3464.33	1.3	158	70	28.0404	6.72222	6.2	7.29	15.6	29.8039	2.25	1.8595	110	135	46	170	5.8	2.62	2.7	35	11	1	996	51.9	409	2691.3
0	49	1	ND	ND	ND	ND	ND	ND	ND	ND	168	ND	ND	ND	ND	ND	ND	ND	ND	ND	ND	ND	ND	ND	ND	ND	ND	ND	ND	ND	ND	ND	ND	ND
0	64	1	7.1	169	93	180	91	3.43333	2423.33	0.366667	162	62	23.6244	5.44444	6.8	0.89	3.1	48.5118	0.41	0.418367	49	106.6	57	37	2.1	4.82	2.5	11	16	1.7	409	5.9	403	2619
0	65	1	ND	ND	ND	ND	ND	ND	ND	ND	168	ND	ND	ND	ND	ND	ND	ND	ND	ND	ND	ND	ND	ND	ND	ND	ND	ND	ND	ND	ND	ND	ND	ND
0	54	0	ND	ND	ND	ND	ND	ND	ND	ND	156	ND	ND	ND	ND	ND	ND	ND	ND	ND	ND	ND	ND	ND	ND	ND	ND	ND	ND	ND	ND	ND	ND	ND
0	60	1	ND	ND	ND	ND	ND	ND	ND	ND	181	ND	ND	ND	ND	ND	ND	ND	ND	ND	ND	ND	ND	ND	ND	ND	ND	ND	ND	ND	ND	ND	ND	ND
0	60	0	6.3	141	81	155	96	2.6	2183.33	2.33333	154	63	26.5643	7.55556	7	12.4	27.1	30.4385	2.71	1.99265	85	97.8	47	96	3.1	2.11	2.8	44	23	1.3	650	30.9	334	2054.6
0	39	1	7.9	122	80	121	64	2.1	3314.33	0.866667	178	69	21.7776	7.44444	6.8	2.6	20.7	110.885	0.9	0.671642	67	99.6	48	72	2	2.11	2.6	16	21	0.7	67	9.5	253	2774.9
0	74	0	4.7	118	65	122	82	2.1	2837	5.2	144	52	25.0772	6	6.9	5	6.5	18.1058	1.1	1.01852	90	106.8	84	66	3.1	3.64	3.6	15	42	1	650	28.6	371	3159.7
0	53	1	10	111	76	119	84	2.86667	2192	5.9	172	83	28.0557	6.16667	6.6	7.5	31.2	57.9387	2.62	2.36036	53	108.2	72	99	3.8	1.97	1.6	25	12	0.6	1170	11.8	441	3201.8
0	66	1	5.7	127	78	132	79	ND	ND	ND	169	83	29.0606	7.11111	6.5	5.87	16.9	40.0981	1.93	1.50781	82	132.8	36	76	2.1	2.37	7.1	16	39	0.7	1330	6.5	313	2459.9
0	60	0	4.9	123	90	137	101	2.36667	2461	2.83333	155	52	21.6441	8.22222	7.7	5.46	26.3	67.087	2.15	1.4527	46	86.2	58	99	2.8	3.42	2	37	6	1	254	6.7	469	2919
0	72	1	4.9	130	61	137	89	ND	ND	ND	156	60	24.6548	8.88889	7.1	1.52	4.9	44.8981	1.14	0.7125	59	108	83	40	4	1.75	7	21	68	0.7	7250	14.3	423	2466.6
0	59	1	2.7	166	95	168	79	2.16667	3506.67	0.3	165	63	23.1405	8	8.3	4.28	24.4	79.4002	1.88	1.30556	76	58	37	110	3.2	2.73	8.7	23	78	0.6	257	5	283	2184.4
1	72	0	2.8	168	68	186	131	1.73333	3776.67	1.76667	149	44	19.8189	6.66667	7.6	1.72	5.7	46.1553	0.67	0.558333	77	116.8	107	51	3.6	9.49	4	12	118	1.3	91	17.6	248	3043.1
1	55	0	9.1	112	70	117	79	2.6	2431.33	1.8	146	66	30.7937	13.6667	7.6	13.4	35	36.378	3.1	1.26016	62	110.8	53	246	8.7	1	3.3	110	32	0.8	1820	21.2	341	2326.8
1	66	1	4.9	134	87	131	78	2.96667	2389	1.2	163	67	25.2174	9	6.3	4.31	16.7	53.9653	1.77	1.09259	47	129.4	80	78	4.8	3.98	3.2	39	45	0.9	2630	9.1	248	2662.7
1	70	1	4.4	129	71	143	109	1.63333	2872.33	1.06667	161	61	23.533	7.55556	6.6	5.73	20.6	50.0712	2.32	1.70588	39	151.8	49	106	4.8	1.58	3.1	22	17	1.3	6270	8.2	427	932.5
1	44	1	4.6	122	79	119	60	1.3	4547.33	2.03333	163	86	32.3685	6.44444	6.7	4.46	23.4	73.0729	1.71	1.47414	77	111.8	35	131	5.1	1.97	1.9	35	14	1.3	1630	3.8	308	7248.4
1	35	1	9.7	114	63	112	68	2.5	2447.33	2.23333	170	84	29.0657	6.38889	7.2	7.37	20.3	38.3623	2.06	1.7913	80	80.8	30	151	4.4	0.85	8.4	41	9	0.6	386	4.9	253	5328.2
1	59	1	8.8	132	90	141	85	1.96667	3508.67	0.333333	168	74	26.2188	8.72222	7.2	4.31	17.1	55.2579	1.54	0.980892	70	136.4	54	98	3.2	3.1	2.3	28	12	0.5	844	4	209	7068.5
1	72	1	2.8	148	83	163	98	2.26667	2827	0.533333	162	62	23.6244	7.66667	6.5	10.2	29.1	39.7346	3.04	2.2029	57	41	38	35	2	1.3	4.1	28	84	1.4	1420	19.6	390	3482.5
1	66	0	4.8	150	81	159	90	3.13333	1981.67	3.16667	144	54	26.0417	7.38889	6.2	5.76	6.7	16.2005	1.42	1.06767	61	124.4	68	53	2.9	10.3	2.7	17	31	0.7	208	18.9	422	2970.9
1	59	1	7.7	106	69	110	75	2.06667	2905	0.8	164	60	22.3081	6.88889	6.7	1.66	6.9	57.8917	1.15	0.927419	45	144.4	65	88	2.7	4.81	3	13	20	0.6	70	2.4	350	2554.4
1	56	1	6.3	144	93	157	95	2.1	3633	1.5	165	64	23.5078	9.11111	6.7	6.31	22.2	49.0003	2.03	1.2378	64	92.4	49	103	3.3	2.97	2.8	24	11	0.8	281	8.5	356	2439.4
1	58	0	ND	ND	ND	ND	ND	ND	ND	ND	158	ND	ND	ND	ND	ND	ND	ND	ND	ND	ND	ND	ND	ND	ND	ND	ND	ND	ND	ND	ND	ND	ND	ND
1	63	1	ND	ND	ND	ND	ND	ND	ND	ND	169	ND	ND	ND	ND	ND	ND	ND	ND	ND	ND	ND	ND	ND	ND	ND	ND	ND	ND	ND	ND	ND	ND	ND
1	35	0	13.5	137	89	137	68	2.16667	3581.33	8.03333	156	74	30.4076	10.4444	9.2	22.3	140	87.4377	4.64	2.46809	124	146.4	67	193	6.6	1.88	4.3	66	23	1.1	1790	97.6	503	2501.5
1	55	1	ND	ND	ND	ND	ND	ND	ND	ND	171	ND	ND	ND	ND	ND	ND	ND	ND	ND	ND	ND	ND	ND	ND	ND	ND	ND	ND	ND	ND	ND	ND	ND
1	63	1	2.8	141	91	151	88	1.86667	3845	0.966667	163	70	26.3465	7.55556	6.7	3.75	8.7	32.312	1.52	1.11765	62	98.6	60	107	4.9	2.48	2.2	16	12	3.2	684	4.3	303	2131.2
1	60	0	6.9	145	85	156	94	1.86667	3573.67	2.4	162	65	24.7676	8.22222	7.2	8.09	30.5	52.5082	2.57	1.73649	128	104.4	46	173	6	1.31	8.8	23	7	1.2	483	5.8	410	2986.7
1	69	0	1.5	133	66	146	96	1.76667	3612.67	0.466667	156	70	28.764	7.72222	6.7	6.6	15.4	32.4977	1.82	1.30935	102	85.6	58	52	2.6	5.74	2.6	42	82	1.8	373	28.8	516	2967.3
1	38	1	9.5	126	87	119	46	1.4	5272.67	3.13333	183	120	35.8327	10	7	17.2	90.3	73.1198	3.17	1.76111	85	99.8	42	66	2.6	2.56	3.2	34	9	1	1170	7.2	283	2539.6
1	80	1	ND	ND	ND	ND	ND	ND	ND	ND	159	ND	ND	ND	ND	ND	ND	ND	ND	ND	ND	ND	ND	ND	ND	ND	ND	ND	ND	ND	ND	ND	ND	ND
1	40	1	7.4	123	72	110	49	2.03333	3179.33	0.633333	167	86	30.8365	11.8889	7.6	9.99	44.3	61.7609	2.63	1.22897	62	142.2	52	229	8.1	1.1	4.6	47	10	1.3	704	11.1	401	3451.4
1	64	1	ND	ND	ND	ND	ND	ND	ND	ND	159	ND	ND	ND	ND	ND	ND	ND	ND	ND	ND	ND	ND	ND	ND	ND	ND	ND	ND	ND	ND	ND	ND	ND
1	62	1	10.7	145	82	162	110	1.9	3826.67	1.46667	165	57	20.9366	5.72222	6	3.49	7.7	30.7285	1.18	1.14563	69	81.6	46	67	2	2.46	2.4	10	213	1	72	6.2	293	2567.1
1	56	1	5.9	120	82	126	78	1.73333	4236	5.13333	167	80	28.6851	7.05556	6.8	4.68	37.4	111.302	1.95	1.53543	47	137.2	37	139	4.1	1.04	2.1	33	25	1.3	2250	10	515	3699.4
1	70	1	0.6	146	65	152	88	2.46667	2740	0.166667	165	63	23.1405	6.55556	6.1	4.21	13	43.0068	0.94	0.79661	51	140.8	56	106	4.5	2.28	2.3	32	53	1.2	767	40.7	287	3421.9
1	59	1	3.7	156	96	171	98	2.3	3186	12.9667	162	79	30.1021	9.27778	7.7	4.51	23.4	72.2628	2.09	1.2515	44	116.2	38	134	4	2.66	3.7	31	15	1.8	1250	65	260	2024.8
1	74	0	1.4	151	68	159	91	2.2	2593.67	1.13333	146	66	30.9627	6.83333	6.7	19.5	33.8	24.1411	3.06	2.4878	52	145.4	60	178	7	2.39	4.8	55	68	1.4	2500	21.8	344	2973.9
1	47	1	3.7	120	80	124	75	2.43333	2312.33	1.36667	168	71	25.1559	8.5	6.1	5.09	21.3	58.2824	2.33	1.52288	61	72.4	59	138	4.6	2.71	2.3	32	8	1.1	622	4.2	301	2408.1
1	59	1	7.3	127	79	124	65	1.83333	3798.33	0.633333	170	71	24.5675	8.61111	6.9	6.97	22.6	45.1597	2.64	1.70323	75	70	63	155	4.6	1.4	3.3	37	50	1.8	2800	5.2	374	3044.2
1	68	1	4.8	140	83	152	93	2.43333	3226	1.66667	165	60	22.0386	9.11111	6.9	6.97	30.4	60.7458	3.96	2.41463	103	140.8	47	306	12.9	1.58	3.3	39	39	1.6	439	706	329	2074.6
1	56	1	6	124	77	120	62	2.93333	2251	1.26667	165	62	22.7732	7.22222	5.8	13.5	10.3	10.6262	2.11	1.62308	76	140.6	49	142	6.3	1.28	2.5	15	24	0.9	542	8.2	338	2530.5
1	47	1	3.7	135	96	135	62	1.83333	4361.33	6.53333	177	95	30.3233	6.83333	6.6	12.1	30.7	35.3369	2.34	1.90244	90	101.8	42	161	6.2	1.42	2.4	29	15	0.9	6300	8.4	300	2948.7
1	71	0	5	118	70	120	75	1.8	3520	0.9	152	59	25.5367	6.94444	6.5	9.66	12.2	17.5897	2.36	1.888	83	98.8	59	16	2.9	2.26	2.6	25.4	16	3.5	360	127	307	3571.2
1	63	1	10	131	75	137	85	1.96667	3899.67	3.1	162	63	24.0055	7.55556	6.5	3.16	8.3	36.5819	1.4	1.02941	53	75	81	90	3.1	5.97	12.2	22	105	0.7	172	38.4	305	4107.2
1	74	0	5.8	125	50	134	93	2.43333	2321.33	0.6	150	41	18.2222	6.55556	6	1.72	8.7	70.4476	0.68	0.576271	50	117	65	50	2.3	13.4	2.7	16	112	0.8	214	9.1	370	3191.9
1	61	1	6	94	53	101	86	1.96667	2842.67	0.3	165	58	21.3039	7.44444	6.5	3.88	10.3	36.9727	1.33	0.992537	62	97.2	59	54	2.3	0.92	9.9	15	14	0.5	113	3.1	273	2628.8
1	58	1	3.7	130	78	145	98	2.33333	12108	0.933333	175	77	25.1429	5.33333	5.9	4.26	22.5	73.5611	1.62	1.6875	108	69	56	100	3.1	1.72	3.6	12	48	0.6	99	6.4	258	3598.8
1	56	0	10.4	133	84	146	99	2.06667	3432.67	0.833333	165	79	29.0174	7.44444	7.3	12.2	39.2	44.7509	3.5	2.61194	67	139	46	100	4.7	2.45	3.7	51	20	1.1	1610	19.2	299	4389.2
1	62	1	3	149	78	154	85	2.6	3436.33	4.13333	173	56	18.7109	8.77778	5.9	3	7.4	34.3547	1.5	0.949367	78	64.8	64	86	2.5	0.8	2.2	19	76	1	1310	111	324	1999.9
1	66	0	4.5	135	75	145	96	2.33333	2549.67	1.46667	155	57	23.7253	7.05556	6.3	2.56	6.2	33.7308	1.09	0.858268	82	165	75	90	5.4	8.53	3	10	73	1.1	278	239	391	2625.9
1	54	1	8.5	119	80	130	89	2.53333	2543.33	0.633333	175	63	20.5714	6.44444	5.9	3.46	10.4	41.8632	1.39	1.19828	68	79.4	57	83	2.8	3.76	2	25	24	1.4	808	4	228	2173.2
1	50	1	8	144	94	156	91	1.9	4129.33	0.6	165	80	29.3848	7.5	6.6	8.43	17.3	28.5821	2.49	1.84444	73	76.6	65	47	2.7	1.48	3.2	31	20	1.1	124	98.9	314	2906.9
1	63	1	1.5	129	86	137	84	1.6	3959	0.733333	157	72	29.2101	8.44444	7.3	3.85	58.8	212.712	3.07	2.01974	100	106.4	41	178	5.6	2.54	2.9	58	22	5.4	705	7.6	372	3002.8
1	76	1	4.8	138	72	149	94	1.7	3756.67	1.8	159	70	27.6888	7	6.7	7.93	29.3	51.46	3.36	2.66667	46	109.4	39	63	2.2	1.9	2.2	40	58	1.3	485	18.7	243	2434.2
1	71	0	ND	ND	ND	ND	ND	ND	ND	ND	140	ND	ND	ND	0.4	ND	ND	ND	ND	ND	ND	ND	ND	ND	ND	ND	ND	ND	ND	ND	ND	ND	ND	ND
1	64	0	ND	ND	ND	ND	ND	ND	ND	ND	156	ND	ND	ND	0.4	ND	ND	ND	ND	ND	ND	ND	ND	ND	ND	ND	ND	ND	ND	ND	ND	ND	ND	ND
1	51	0	4.6	130	84	133	75	2.93333	2323.33	2.73333	160	74	28.9062	5.38889	6.2	5.33	11.7	30.5727	1.45	1.49485	92	115.2	67	89	3.2	2.13	2.4	22	32	0.8	305	293	353	3074.6
1	64	1	2.8	132	83	137	79	ND	ND	ND	174	71	23.4509	6.4	6.8	2.92	9.5	45.3123	1.74	1.5	54	121.6	42	322	11	2.76	2.6	12	79	1.3	244	16.6	269	2348.1
